# Supplementary material for: Asymptomatic Hyperuricemia Is Associated with Achilles Tendon Rupture through Disrupting the Normal Functions of Tendon Stem/Progenitor Cells
Source: Stem Cells Int. 2022 Dec 1;2022:6795573. doi: 10.1155/2022/6795573 (PMC9731760; doi:10.1155/2022/6795573)

## Supplementary Table 1

Primer sequences used in real-time PCR.

| Gene           | Forward (5'→3')          | Reverse (5'→3')         |
|----------------|--------------------------|-------------------------|
| MMP2           | CAACTACAAC TTCTTTCCCCGC  | TTGATCATGATGTCAGCTTCCC  |
| MMP3           | ATCCCCTGATGTCCTCGTGGT    | GGGTCCTGAGAGATTTTCGCC   |
| MMP13          | CCAACCCTAAGCACCCCAAAC    | TCCTCAAAGTGAACCGCAGCAC  |
| IL1 $\beta$    | GCACCTTCTTTTCCTTCATCTTTG | TTTGTCGTTGCTTGTCTCTCCTT |
| IL6            | TCCTACCCCAACTTCCAATGCTC  | TTGGATGGTCTTGGTCCTTAGCC |
| TNF $\alpha$   | AAATGGGCTCCCTCTCATCAGTTC | CCGCTTGGTGGTTTGCTACGAC  |
| $\beta$ -Actin | TCAGGTCATCACTATCGGCAAT   | AAAGAAAGGGTGTAACGCAG    |

## Supplementary Figure 1

Pearson correlations of age and ATR incidence ( $P < 0.0001$ ). The incidence of ATR were calculated as the percentile of ATR patient numbers to the total number of participants of the same age. Age range were 18-60 years old, as matched to the control group.

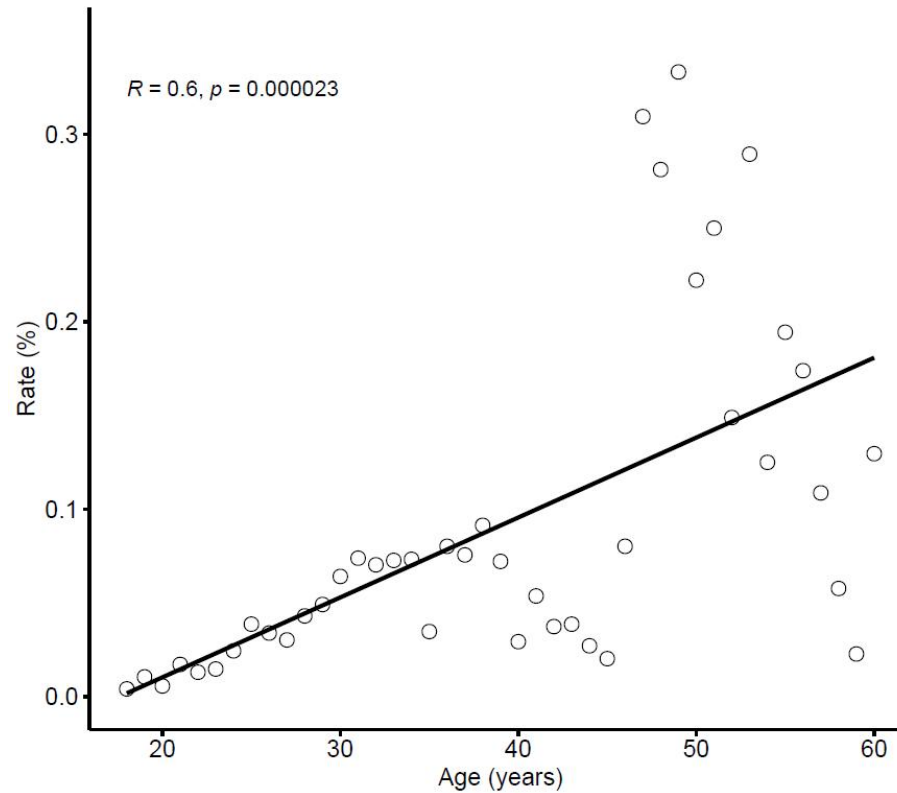

## Supplementary Figure 2

Flow cytometric analysis of Annexin V-PI staining results for TSPCs treated with different doses of UA.

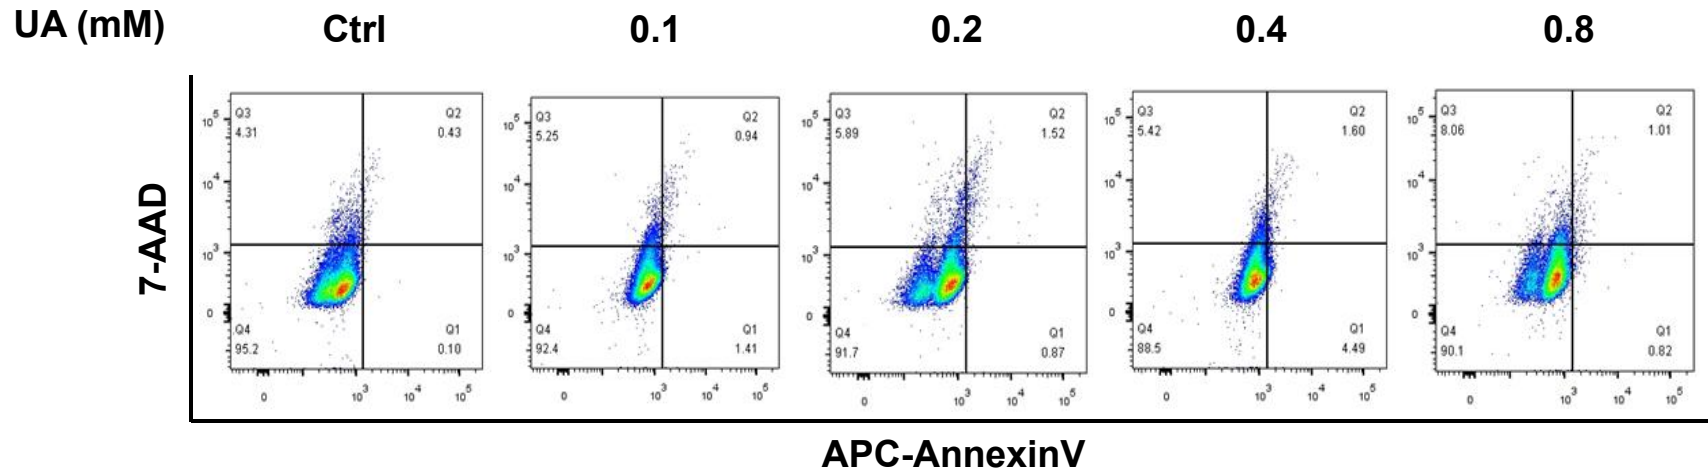

### Supplementary Figure 3

Quantification for the Oil Red-O staining (a), Alizarin Red staining (b) and Safranin-O staining (c) staining images in Figure 3 of TSPCs differentiation potential when treated with different doses of UA (n = 3). Data were the normalized ratio of staining intensity of each treatment group over that of the PBS control. Values are the mean  $\pm$  SD staining intensity of representative images of three independent experiments. \*:  $P < 0.05$ ; \*\*:  $P < 0.01$ ; \*\*\*\*:  $P < 0.0001$  versus PBS control.

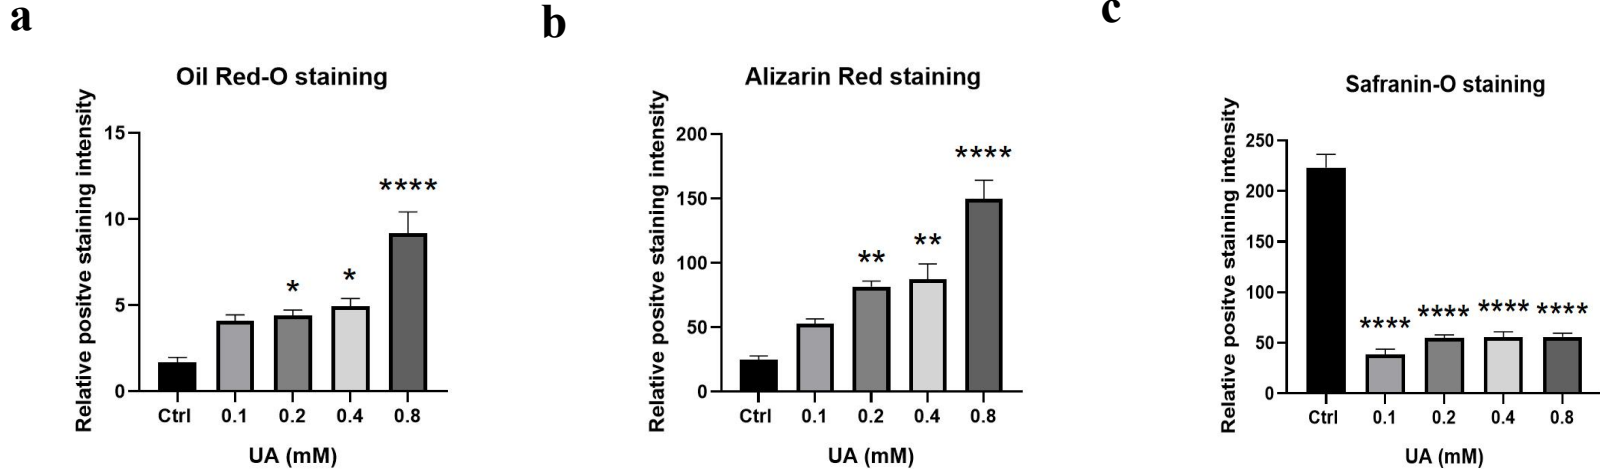

## Supplementary Figure 4

Quantification of CD3 (**a**) and CD68 (**b**) immunofluorescent staining results in Figure 4b and 4c, respectively ( $n = 3$ ). Values are the mean  $\pm$  SD staining intensity of representative images of three independent experiments. Real-time qPCR results of pro-inflammatory markers (**c**) and degradative enzymes (**d**) in TSPCs treated with different concentrations of UA or PBS ( $n = 3$  each). Values show the mean  $\pm$  SEM. \*:  $P < 0.05$ ; \*\*:  $P < 0.01$ ; \*\*\*:  $P < 0.001$ ; \*\*\*\*:  $P < 0.0001$  versus PBS-treated control within each group, analyzed using two-way ANOVA. Results are from two independent experiments.

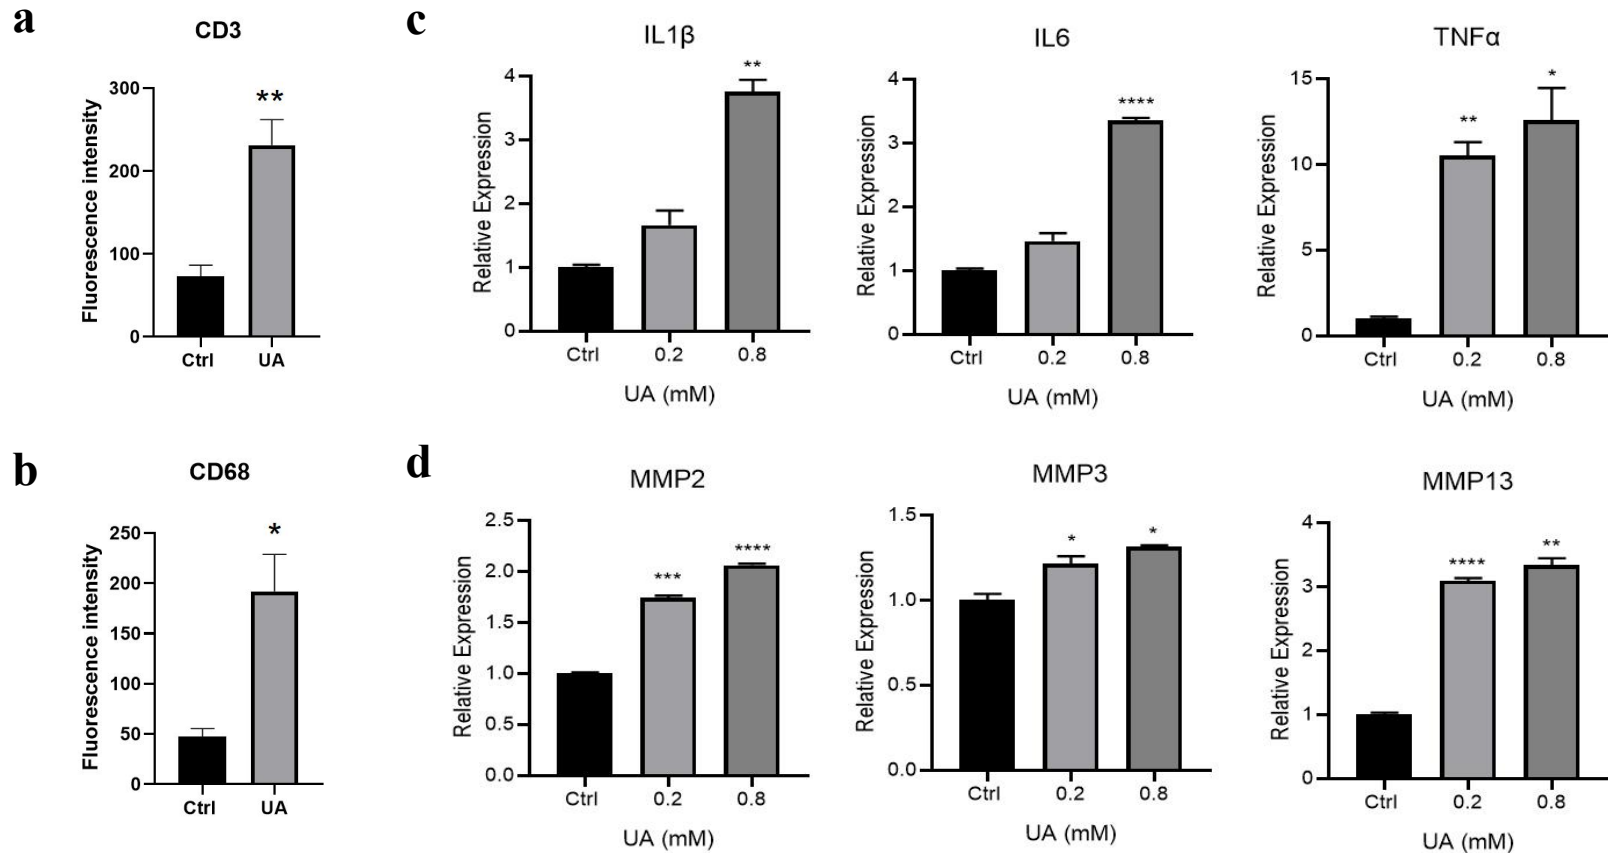

### Supplementary Figure 5

Venn diagrams illustrate the sharing of DEG between TSPCs treated with control (PBS) or different concentrations of UA. Ctrl: TSPCs treated with PBS, T02: TSPCs treated with 0.2 mM of UA, T08: TSPCs treated with 0.8 mM UA. The numbers (13, 29, 27 and 3) indicate the DEG between two groups.

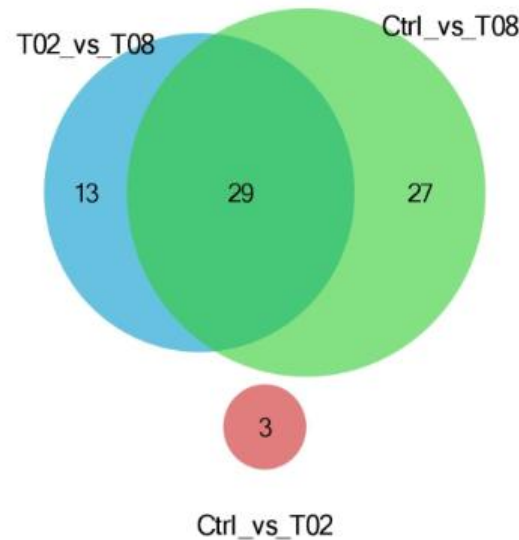

## Supplementary Figure 6

Quantification for Western blot analysis images in Figure 5C of TSPCs treated with different doses of UA (n = 3). Data were the normalized ratio of indicated protein expression over that of the corresponding loading control. Values are the mean  $\pm$  SEM from three independent experiments. \*:  $P < 0.05$ ; \*\*:  $P < 0.01$ ; \*\*\*:  $P < 0.001$ ; \*\*\*\*:  $P < 0.0001$  versus PBS control.

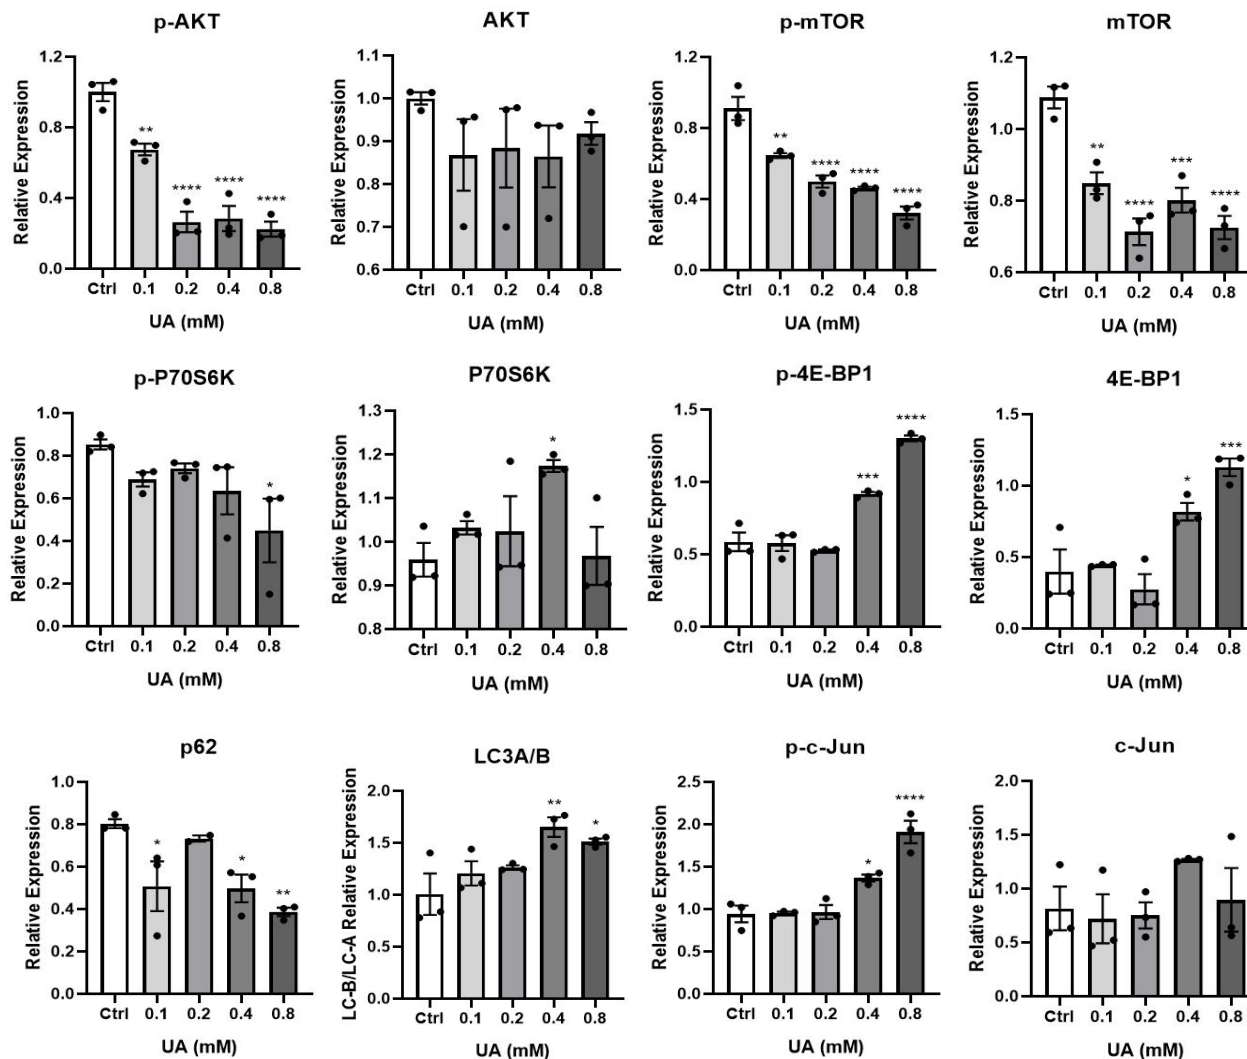

Supplement: Supplementary Materials — Supplementary Table 1: primer sequences used in real-time PCR. Supplementary Figure 1: Pearson's correlations of age and ATR incidence (P < 0.0001). The incidences of ATR were calculated as the percentile of ATR patient numbers to the total number of participants of the same age. Age range was 18-60 years old, as matched to the control group. Supplementary Figure 2: flow cytometric analysis of annexin V-PI staining results for TSPCs treated with different doses of UA. Supplementary Figure 3: quantification for the oil red O staining (a), alizarin red staining (b), and safranin O staining (c) images in Figure 3 of TSPC differentiation potential when treated with different doses of UA (n = 3). Data were the normalized ratio of staining intensity of each treatment group over that of the PBS control. Values are the mean ± SD staining intensity of representative images of three independent experiments. ∗P < 0.05; ∗∗P < 0.01; ∗∗∗∗P < 0.0001 versus PBS control. Supplementary Figure 4: quantification of CD3 (a) and CD68 (b) immunofluorescent staining results in Figures 4(b) and 4(c), respectively (n = 3). Values are the mean ± SD staining intensity of representative images of three independent experiments. Real-time qPCR results of proinflammatory markers (c) and degradative enzymes (d) in TSPCs treated with different concentrations of UA or PBS (n = 3 each). Values show the mean ± SEM. ∗P < 0.05; ∗∗P < 0.01; ∗∗∗P < 0.001; ∗∗∗∗P < 0.0001 versus PBS-treated control within each group analyzed using two-way ANOVA. Results are from two independent experiments. Supplementary Figure 5: Venn diagrams illustrate the sharing of DEG between TSPCs treated with control (PBS) or different concentrations of UA. Ctrl: TSPCs treated with PBS; T02: TSPCs treated with 0.2 mM of UA; T08: TSPCs treated with 0.8 mM UA. The numbers (13, 29, 27, and 3) indicate the DEG between two groups. Supplementary Figure 6: quantification for Western blot analysis images in Figure 5(c) of TSPCs treated with [file 6795573.f1.pdf]
